# Supplementary material for: Sphingolipid and Endocannabinoid Profiles in Adult Attention Deficit Hyperactivity Disorder
Source: MDPI journal article supplement (doi:10.3390/biomedicines9091173), 2021-09-06
Supplement: s1 [file s1]

## Supplementary Tables

### Supplementary Table S1: Abbreviations

#### Abbreviations

|              |                                                                        |
|--------------|------------------------------------------------------------------------|
| BMI          | Body mass index                                                        |
| MD           | Major depression                                                       |
| BP           | Bipolar disorder                                                       |
| ECT          | Electroconvulsive therapy                                              |
| BDI          | Beck Depression Inventory                                              |
| YMRS         | Young Mania Rating Scale                                               |
| LC-ESI-MS/MS | Liquid chromatography-electrospray ionization-tandem mass spectrometry |
| LLOQ         | Lower limit of quantification                                          |
| ULOQ         | Upper limit of quantification                                          |
| QC           | Quality control                                                        |
| IS           | Internal standard                                                      |
| UHPLC        | Ultrahigh performance liquid chromatography                            |
| m/z          | Mass transition                                                        |
| Cer          | Ceramide                                                               |
| GlcCer       | Glucosylceramide                                                       |
| LacCer       | Lactosylceramide                                                       |
| PCA          | Principal component analysis                                           |
| DA           | Discriminant analysis                                                  |
| PLS          | Partial least square analysis                                          |
| ANOVA        | Analysis of variance                                                   |
| CanDisc      | Canonical discriminant score                                           |
| CI           | Confidence interval                                                    |
| CHAID        | Chi-square automatic interaction detection                             |

#### Abbreviations of analytes

| Lipid name        | Long name                   | Short name |
|-------------------|-----------------------------|------------|
| AEA               | Anandamide                  | AEA        |
| OEA               | Oleylethanolamide           | OEA        |
| PEA               | Palmitoylethanolamide       | PEA        |
| 1AG / 2AG         | 1/2-Arachidonoylglycerol    | 1AG / 2AG  |
| SPH d18:1/16:1    | C16 Sphingosin-1-phosphate  | S1P d16:1  |
| SPH d18:1/18:1    | C18 Sphingosin-1-phosphate  | S1P d18:1  |
| SPH d18:0/18:1    | C18 Sphinganine-1-phosphate | S1P d18:0  |
| Cer d18:1/16:0    | C16 Ceramide                | Cer16      |
| Cer d18:1/18:0    | C18 Ceramide                | Cer18      |
| Cer d18:1/20:0    | C20 Ceramide                | Cer20      |
| Cer d18:1/22:0    | C22 Ceramide                | Cer22      |
| Cer d18:1/24:0    | C24 Ceramide                | Cer24      |
| Cer d18:1/24:1    | C24:1 Ceramide              | Cer24:1    |
| GlcCer d18:1/16:0 | 16C Glucosylceramide        | GluCer16   |
| GlcCer d18:1/18:0 | 18C Glucosylceramide        | GluCer18   |
| GlcCer d18:1/24:1 | C24:1 Glucosylceramide      | GluCer24:1 |
| LacCer d18:1/16:0 | C16 Lactosylceramide        | LacCer16   |
| LacCer d18:1/18:0 | C18 Lactosylceramide        | LacCer18   |
| LacCer d18:1/18:1 | C18:1 Lactosylceramide      | LacCer18   |
| LacCer d18:1/24:0 | C24 Lactosylceramide        | LacCer24   |
| LacCer d18:1/24:1 | C24:1 Lactosylceramide      | LacCer24:1 |

**Supplementary Table S2: Drug treatments (Excel file)**

## Supplementary Figures and Legends

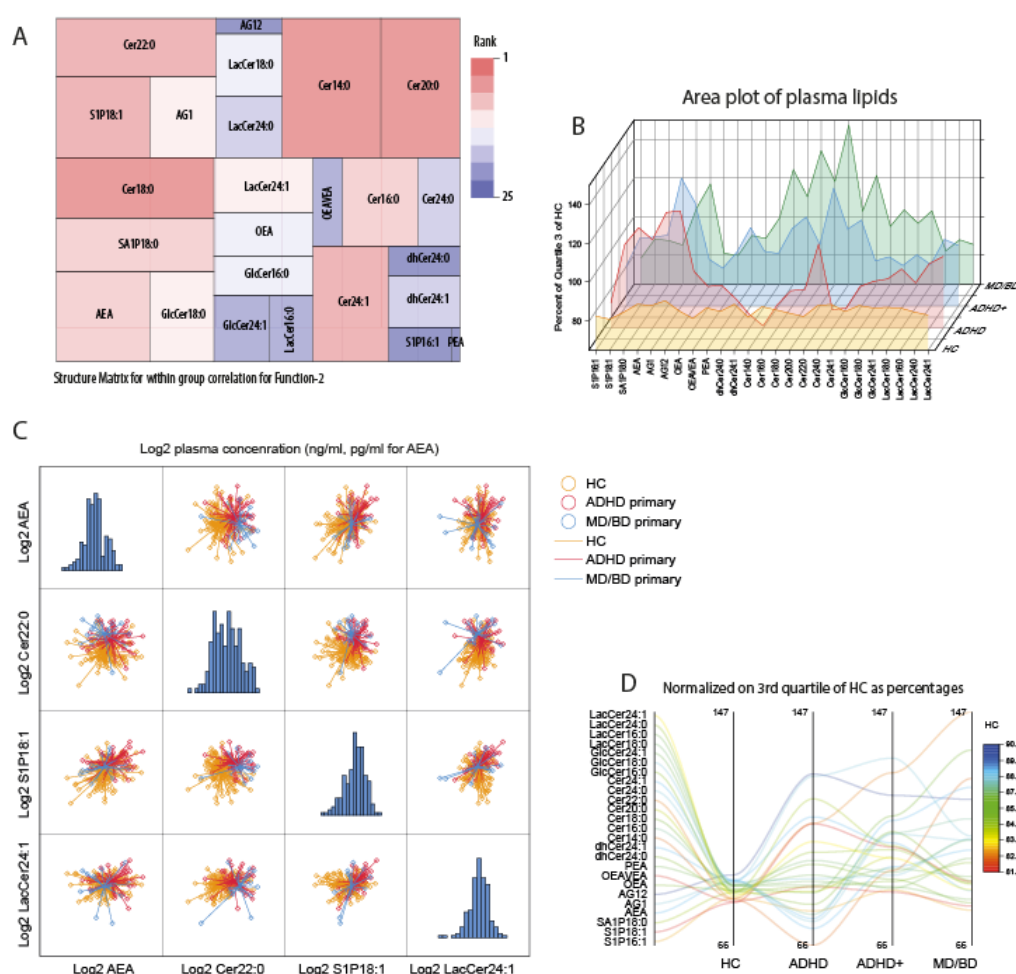

### Supplementary Figure S1: Canonical discriminant analysis and lipid profiles

**A:** Tree map of the CanDisc structure matrix for function-2 (function-1 in Fig. 1B), which mainly discriminates between different patient groups. The sizes of the rectangles and the colors reveal the relative importance of the respective lipid for the discrimination of the groups, the sizes represent the within group correlations and the colors show the ranking. **B:** Waterfall plot of the lipid profiles. Lipid concentrations were normalized to the 75% quartile of the healthy controls, and they are presented as percentages. The respective area plot with error bars is shown in Fig. 1D. **C:** XY scatter plots with centroid spikes for candidate lipids. The plots show patients with attention deficits/hyperactivity disorder (ADHD), ADHD with a comorbidity of major depression (MD) or bipolar disorder (BD) (ADHD+), patients with MD/BD without ADHD, or healthy controls (HC). Each scatter is one subjects, the spikes originates from the groups' centroid. Samples sizes: n=49 ADHD or ADHD+, n=22 MD/BD, n=98 HC. The groups can be separated based on each two lipids, best separation is obtained from Cer22:0 by S1P d18:1, AEA by Cer22:0 and Cer22:0 by LacCer24:1. **D:** Line plots of normalized lipids. Concentrations were normalized as percentages of the 75% quartile of HC.

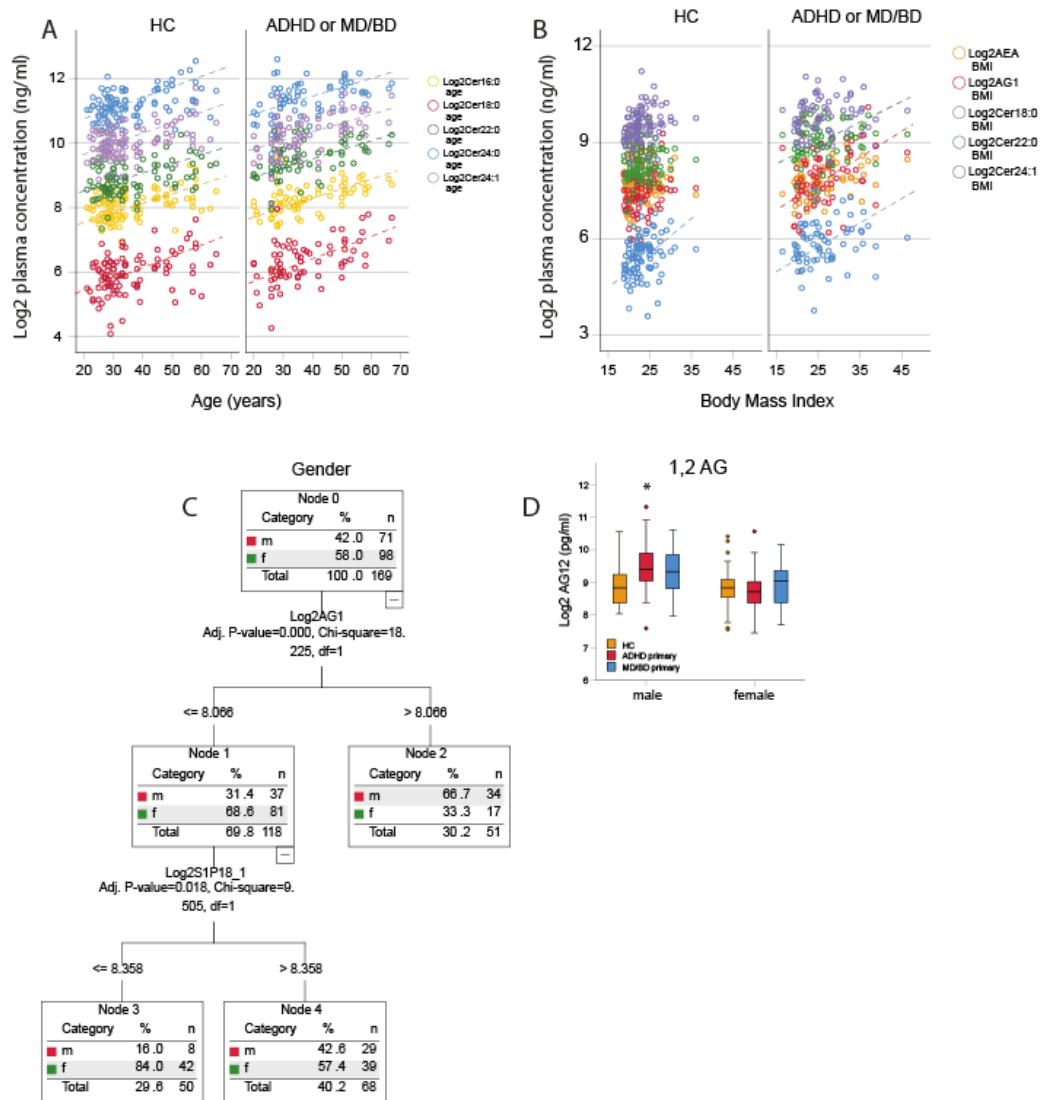

## Supplementary Figure S2: Impact of gender, age and body mass index

**A:** XY scatter plots show a linear increase of ceramide concentrations with age for all ceramides in healthy controls (HC) and in patients with attention deficit hyperactivity disorder (ADHD) without or with comorbidity, and in patients with major depression (MD) or bipolar disorder (BD). The dashed lines are the regression line. All slopes differed significantly from zero. Samples sizes: n=49 ADHD or ADHD+, n=22 MD/BD, n=98 HC. **B:** XY scatter plots show the associations of lipid concentrations with body mass index (BMI). Dashed lines show the regression lines for those lipids where the slopes differed significantly from zero. **C:** Decision tree of CHAID (Chi-square automatic interaction detection) analysis for gender. Male and female patients differ in 1-AG levels. **D:** Box plots of 1/2-AG grouped for sex. The box plots show the log<sub>2</sub> plasma concentration of the sum of 1AG and 2AG. The box is the interquartile range (IQR), and the line is the median. The whiskers show the range, and the dots are outlier. Data were compared with MANOVA for "group" by "sex" and subsequently for group versus HC for each sex with adjustment of alpha according to Dunnett. \*P<0.05. Sample sizes as in A.

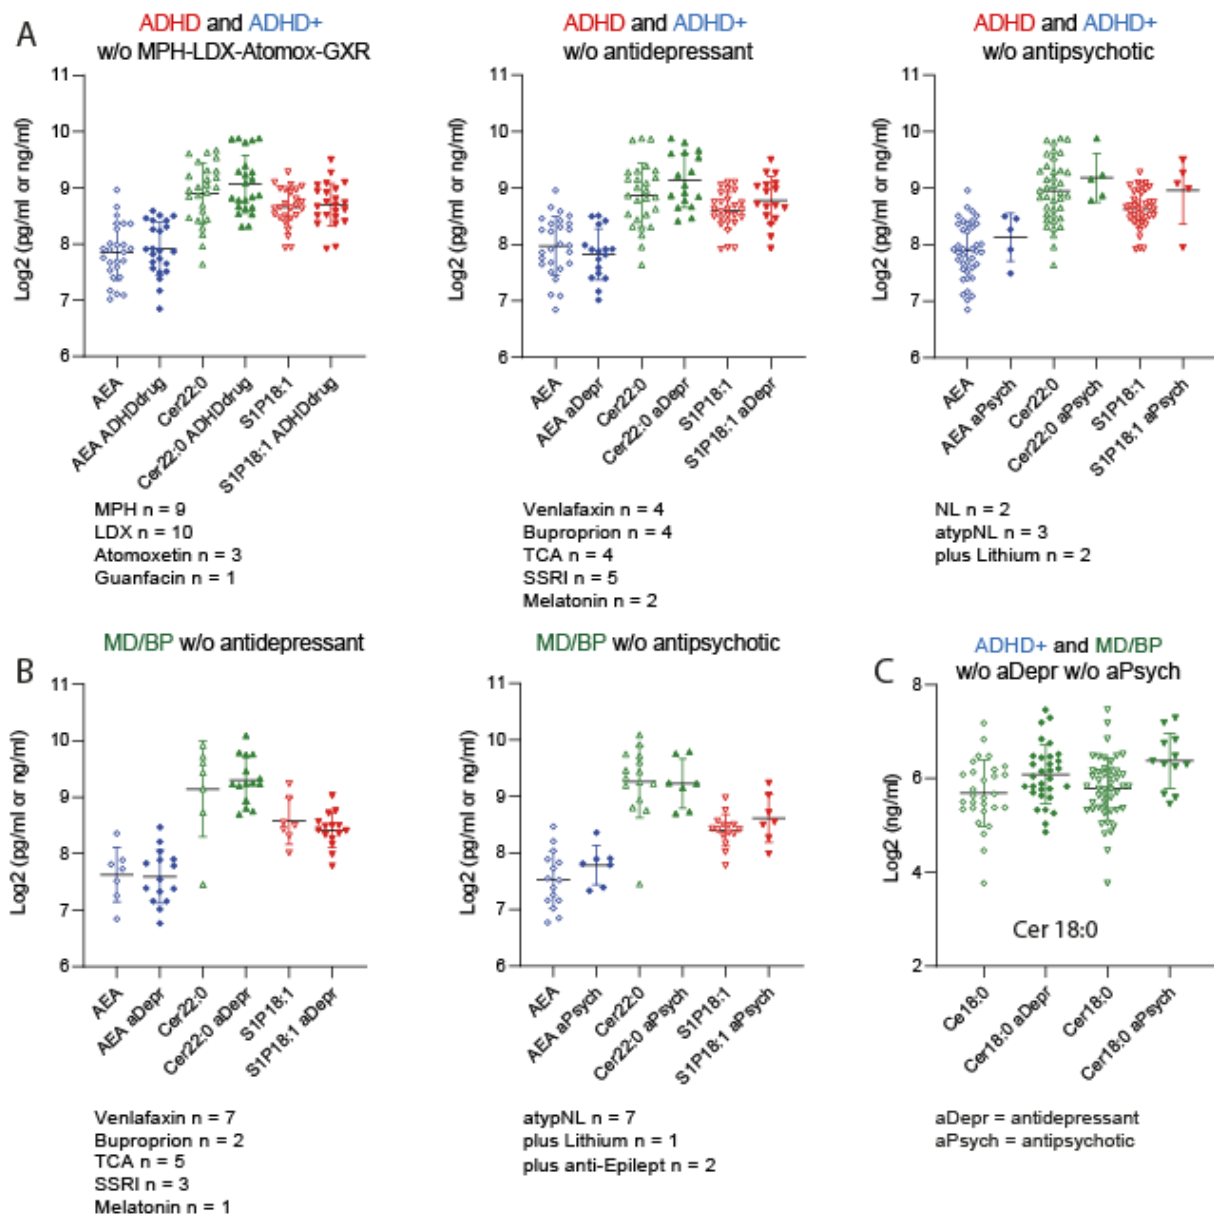

### Supplementary Figure S3: Influence of drug treatments

**A:** Scatter plots of log2 plasma concentrations of the candidate lipids, anandamide (AEA in pg/ml), C22-ceramide Cer 22:0 (in ng/ml) and sphingosine-1-phosphate S1P 18:1 (in ng/ml) in ADHD patients and patients with MD/BP comorbidity (ADHD+) without drug treatment and with drug treatment (w/o = with and without). Numbers of patients receiving specific drugs are indicated. One patients received lisdexamfetamine plus guanfacine. Abbreviations MPH, methylphenidate; LDX, disdexamfetamine; Atomox, Atomoxetine; GXR, guanfacine. **B:** Scatter plots of patients with primary MD/BP without and with treatment with antidepressants and/or anti-neuroleptic agents (NL). Please note that two patients received also Lithium or an anti-epileptic agent. **B:** Scatter plots of the log2 plasma concentrations of Cer 18:0 in ADHD+ (ADHD with comorbidity) and primary MD/BP receiving or not receiving an antidepressant (venlafaxine, bupropion, TCA or SSRI) and w/o anti-psychotic agent (NL or atypNL). Antidepressant and anti-psychotic were combined in 8/12 cases.
